# Supplementary material for: Characterization of Distinct Microbiota Associated with Scalp Dermatitis in Patients with Atopic Dermatitis
Source: MDPI journal article supplement (doi:10.3390/jcm11061735), 2022-03-21
Supplement: s1 [file s1]

**Table S1.** Summary for total read count of sequence reads.

| <b>Group/Sample No.</b> | <b>Raw Read Count</b> | <b>Sequence Read Count Aligned with 16S</b> | <b>Raw Read Count</b> | <b>Sequence Read Count Aligned with ITS</b> |
|-------------------------|-----------------------|---------------------------------------------|-----------------------|---------------------------------------------|
| AD/1                    | 177,454               | 34,966                                      | 190,052               | 79,102                                      |
| AD/2                    | 164,248               | 26,628                                      | 206,148               | 74,074                                      |
| AD/3                    | 174,332               | 24,859                                      | 200,694               | 79,675                                      |
| AD/4                    | 172,536               | 50,979                                      | 192,684               | 70,398                                      |
| AD/5                    | 184,038               | 33,435                                      | 187,940               | 69,945                                      |
| AD/6                    | 201,800               | 52,833                                      | 213,256               | 80,432                                      |
| AD/7                    | 207,502               | 74,412                                      | 214,662               | 80,070                                      |
| AD/8                    | 159,074               | 29,288                                      | 248,738               | 103,180                                     |
| AD/9                    | 173,794               | 40,660                                      | 202,704               | 83,818                                      |
| AD/10                   | 247,762               | 44,944                                      | 233,566               | 99,933                                      |
| HC/1                    | 183,616               | 30,992                                      | 205,880               | 87,902                                      |
| HC/2                    | 180,242               | 32,670                                      | 192,514               | 84,235                                      |
| HC/3                    | 156,024               | 32,865                                      | 219,392               | 86,844                                      |
| HC/4                    | 159,120               | 23,820                                      | 211,002               | 85,303                                      |
| HC/5                    | 192,056               | 19,775                                      | 195,186               | 84,823                                      |
| HC/6                    | 193,298               | 34,821                                      | 160,252               | 50,251                                      |
| HC/7                    | 158,172               | 47,980                                      | 228,002               | 96,715                                      |
| HC/8                    | 169,184               | 29,357                                      | 198,740               | 81,057                                      |
| HC/9                    | 155,000               | 13,825                                      | 229,046               | 91,723                                      |
| HC/10                   | 205,214               | 31,795                                      | 205,296               | 75,799                                      |
